# Supplementary material
Source: Springer Nature journal article supplement (https://www.springermedizin.de/resource/supplementary/12879_2011_2064_MOESM1_ESM.pdf/9443402)

### Summer

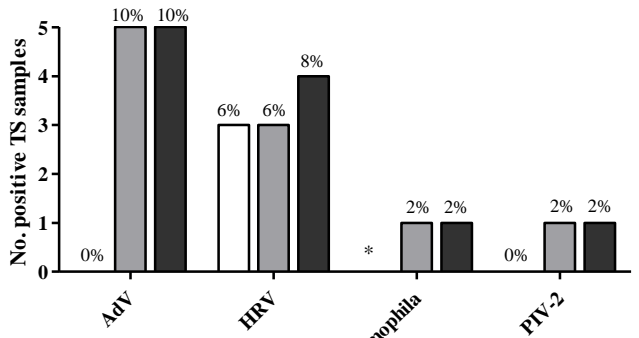

### Winter

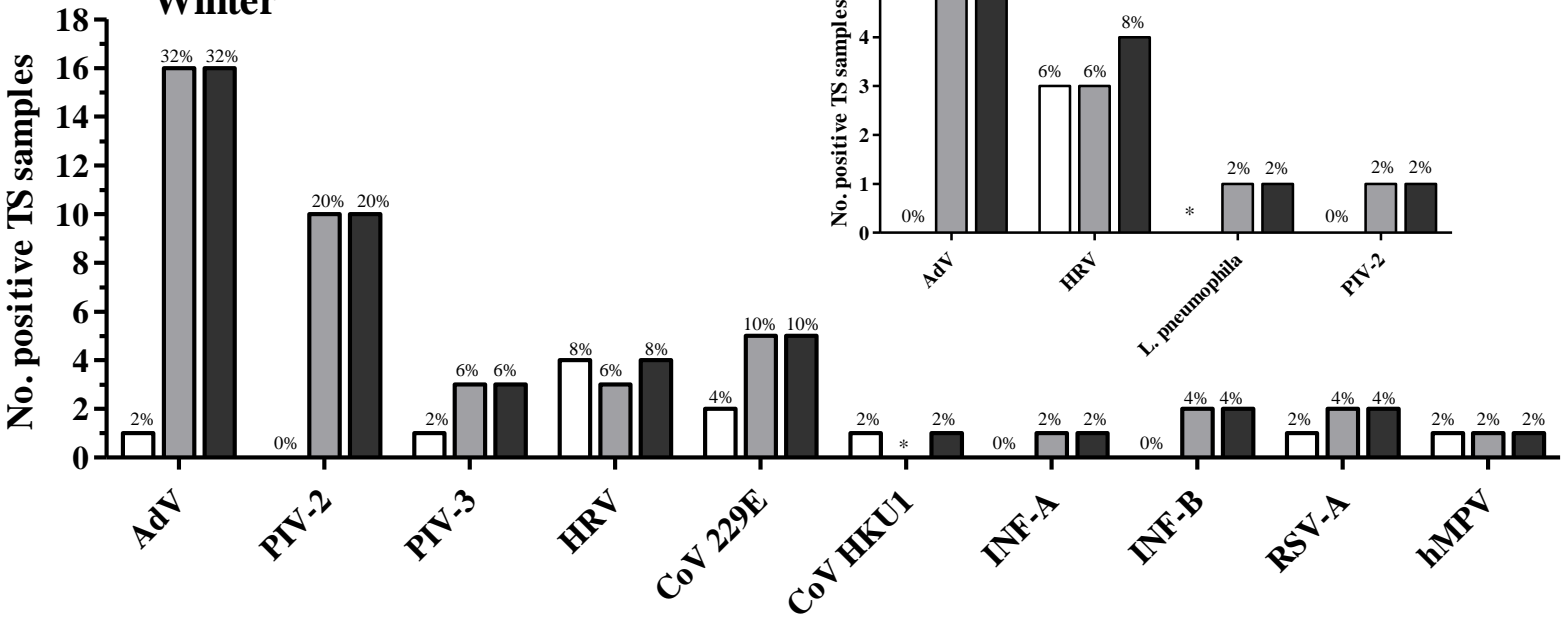

□ RVP Fast assay    ■ RespiFinder 19 assay    ■ real-time PCR

Supplement: MOESM1 [file 9443402]
